# Supplementary material for: Refuting phylogenetic relationships
Source: Springer Nature journal article supplement (doi:10.1186/1745-6150-1-26), 2006-09-06
Supplement: Additional file 1 [file 1745-6150-1-26-s1.pdf]

A feeling of the notions of “basic” and “combined” impossibility

A “basic” impossibility: ●

(1,2) are not with (3,4,5,6)

which we deduce from:

\*\* . . . . > user defined threshold ●

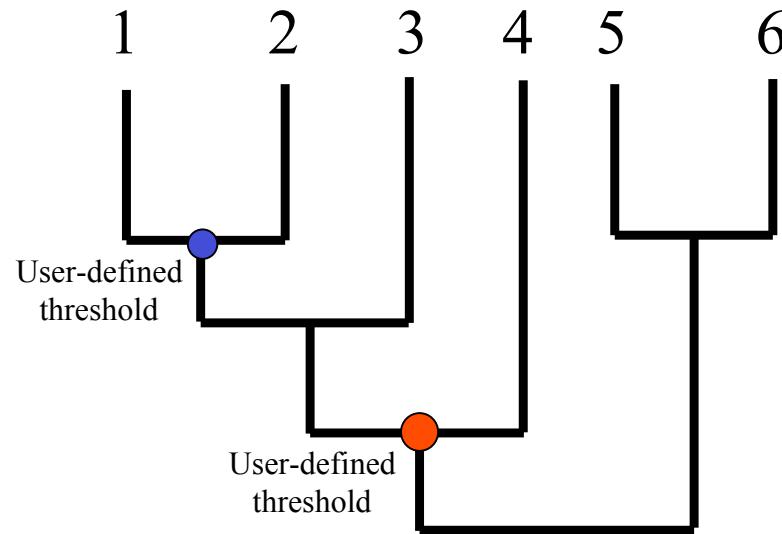

A “combined” impossibility: ● + ●

(1,2) are not with (5,6)

which we deduce from the comparison of multiple bipartitions:

\*\* . . . . > user defined threshold ●

and

\*\*\*\* . . > user defined threshold ●

# An example of an impossibility diagram

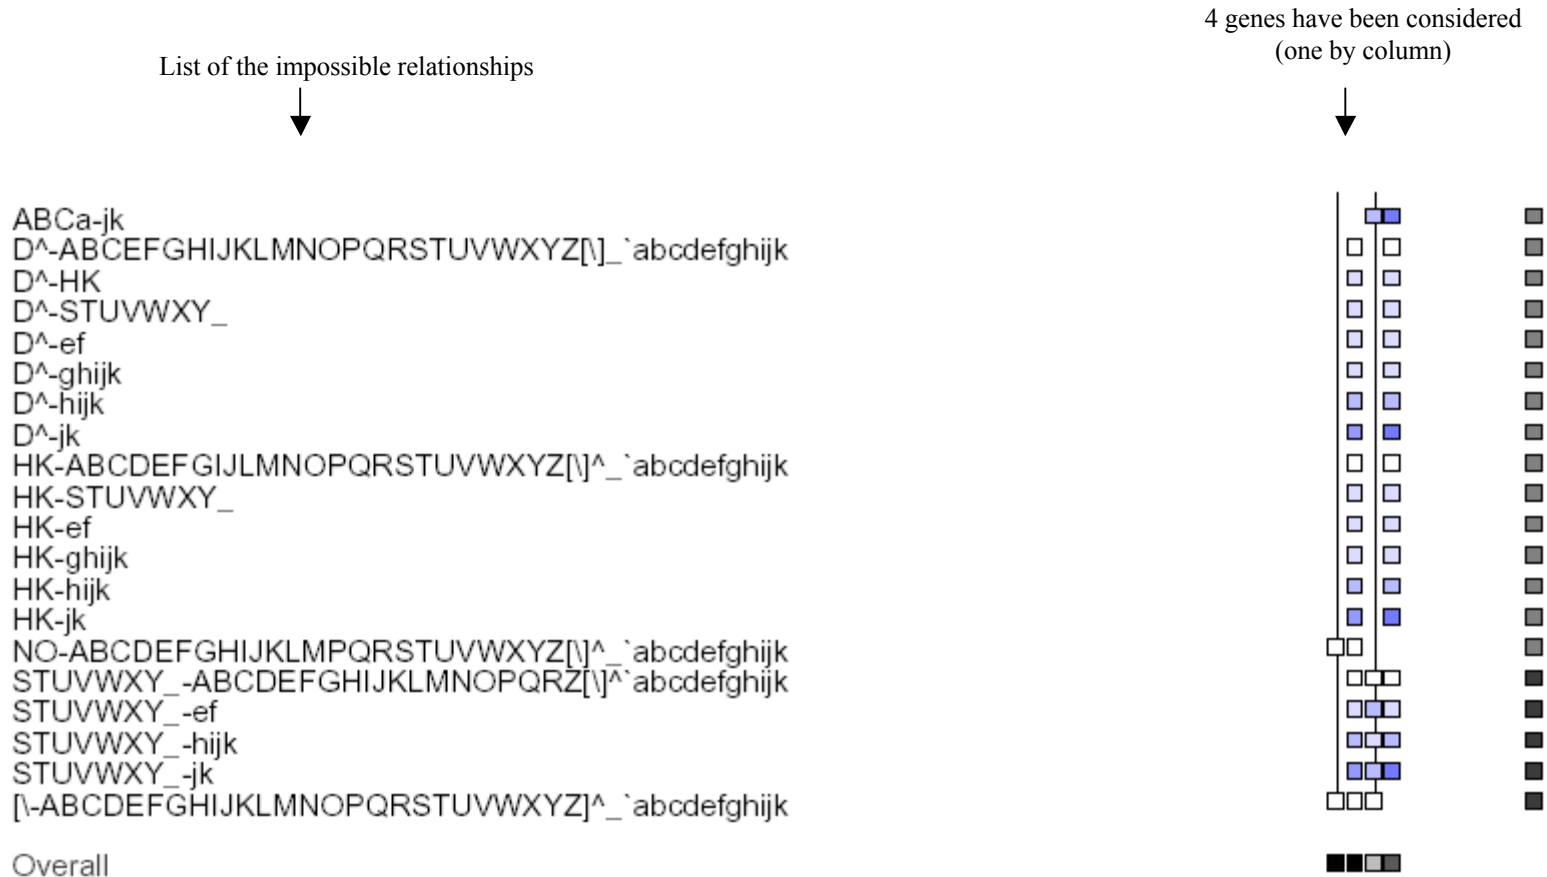

The ‘-’ split two sets of organisms that should not be grouped together  
The darker the square the most unlikely the relationship is  
No square: the relation is possible according to that gene

# An example of a group-group diagram

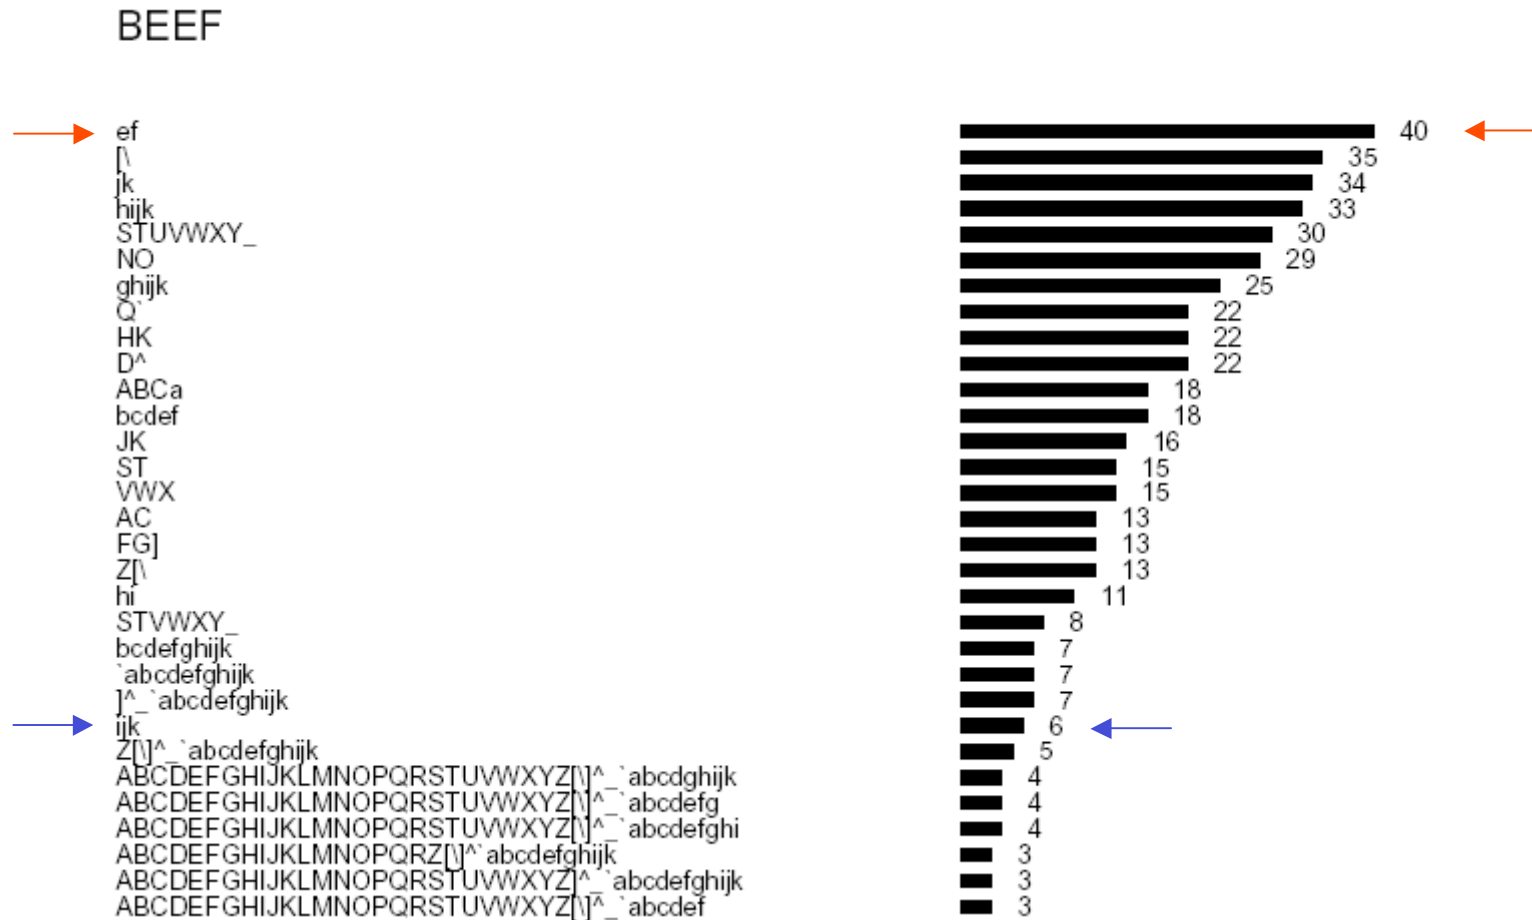

The relationship between **ef** is the most rejected. Its arbitrary degree of impossibility is of 40  
**ijk** by contrast is only weakly rejected (6) over all the bipartitions with a support larger than  
 a user defined threshold.

# An example of a species-group diagram

Z PIG

|                                            |   |
|--------------------------------------------|---|
| [                                          | 3 |
| VWX                                        | 3 |
| ST                                         | 3 |
| bcdef                                      | 3 |
| STUVWXY_                                   | 3 |
| D^                                         | 2 |
| bcdefghijk                                 | 2 |
| Q`                                         | 2 |
| ]^_`abcdefghijkl                           | 2 |
| `abcdefghijkl                              | 2 |
| HK                                         | 2 |
| ABCa                                       | 2 |
| hi                                         | 1 |
| ABCDEFGHIJKLMNOPQRSTUVWXYZ                 | 1 |
| INO                                        | 1 |
| ABCDEFGHIJKLMNOPQR                         | 1 |
| AC                                         | 1 |
| STVWXY_                                    | 1 |
| ABCDEFGHIJKLMNOPQRSTUVWXYZ]^_`abcdefghijkl | 1 |
| ijk                                        | 1 |
| FG]                                        | 1 |
| ABC                                        | 1 |

The impossibility grouping of the species “Z” within any of the listed group receives a certain value.

The higher the number the most rejected the relationship.

That way it is easy to evaluate for a species of interest with which other it would not group.

(PIG stand for pairwise impossible grouping)

# An example of a pairwise impossibility diagram

OAT

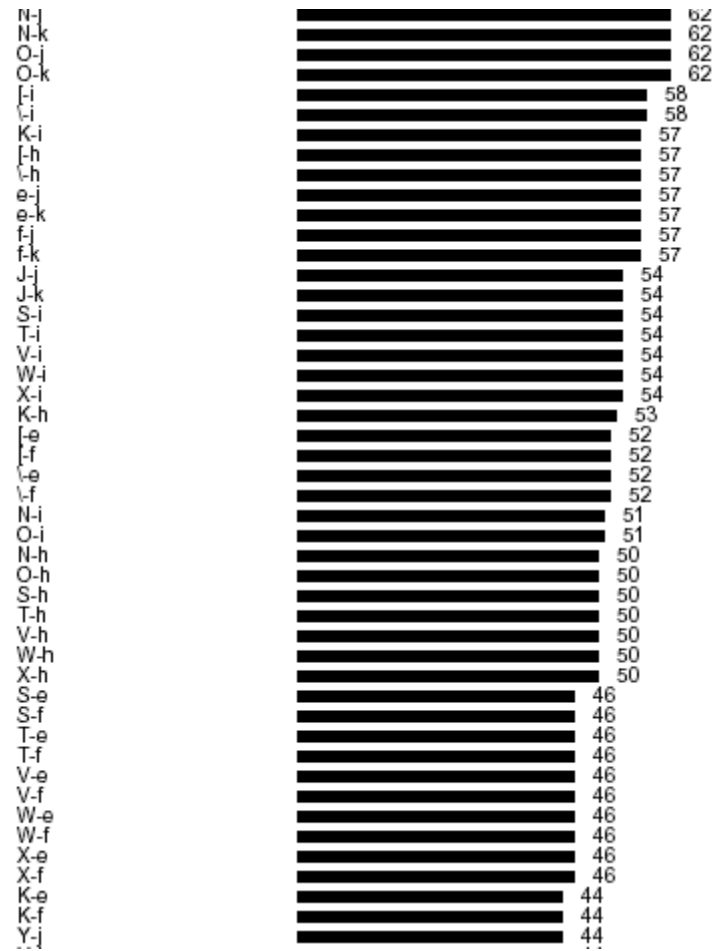

The larger the value the least closely related the species are
